# Supplementary material for: Doping of Cu(i) ions into CdS/ZnS core/shell nanocrystals through a cation exchange strategy
Source: Royal Society of Chemistry journal article supplement (doi:10.1039/c9tc05173b), 2019-01-01
Supplement: c9tc05173b1.pdf [file c9tc05173b1.pdf]

## **Electronic Supplementary Information (ESI)**

### **Doping Cu(I) ions into CdS/ZnS core/shell nanocrystals through a cation exchange strategy**

Mingrui Liu,<sup>a</sup> Lijin Wang,<sup>a</sup> Zhongyuan Guan,<sup>a</sup> Zhenyang Liu,<sup>a</sup> Yongsheng Zhu,<sup>\*b</sup> Aiwei Tang<sup>\*a</sup>

*<sup>1</sup>Key Laboratory of Luminescence and Optical Information, Ministry of Education, School of Science, Beijing Jiaotong University, Beijing 100044, China*

*E-mail: awtang@bjtu.edu.cn*

*<sup>2</sup>College of Physics and Electronic Engineering, Nanyang Normal University, Nanyang 73061, China*

*E-mail: yongshengzhu0001@163.com*

**Figure S1**

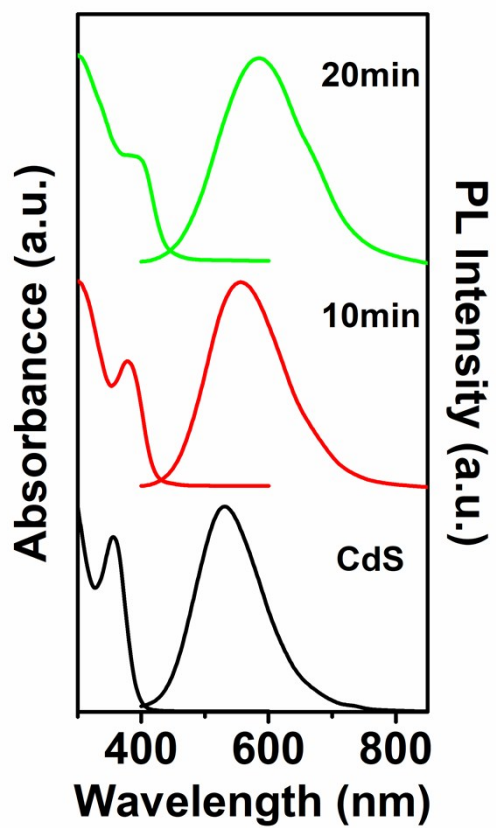

**Figure S1.** Absorption and PL spectra of the unwashed CdS NCs after injecting Zn precursors for different reaction time.

**Figure S2**

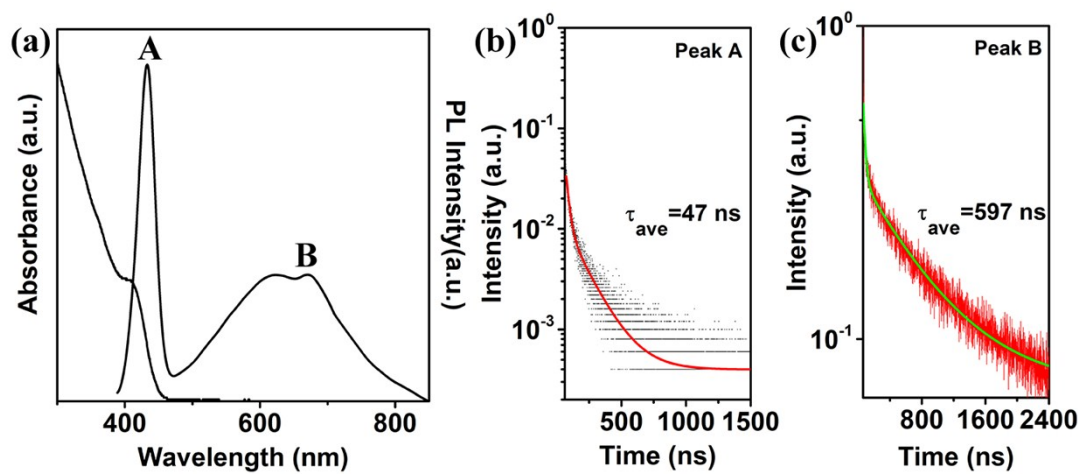

**Figure S2.** (a) Absorption and PL spectra of the CdS/ZnS NCs after injecting 0.5 mL of Cu precursor solution, and the corresponding PL decay curves detected by the peaks at (b) shorter wavelength and (c) longer wavelength.

**Figure S3**

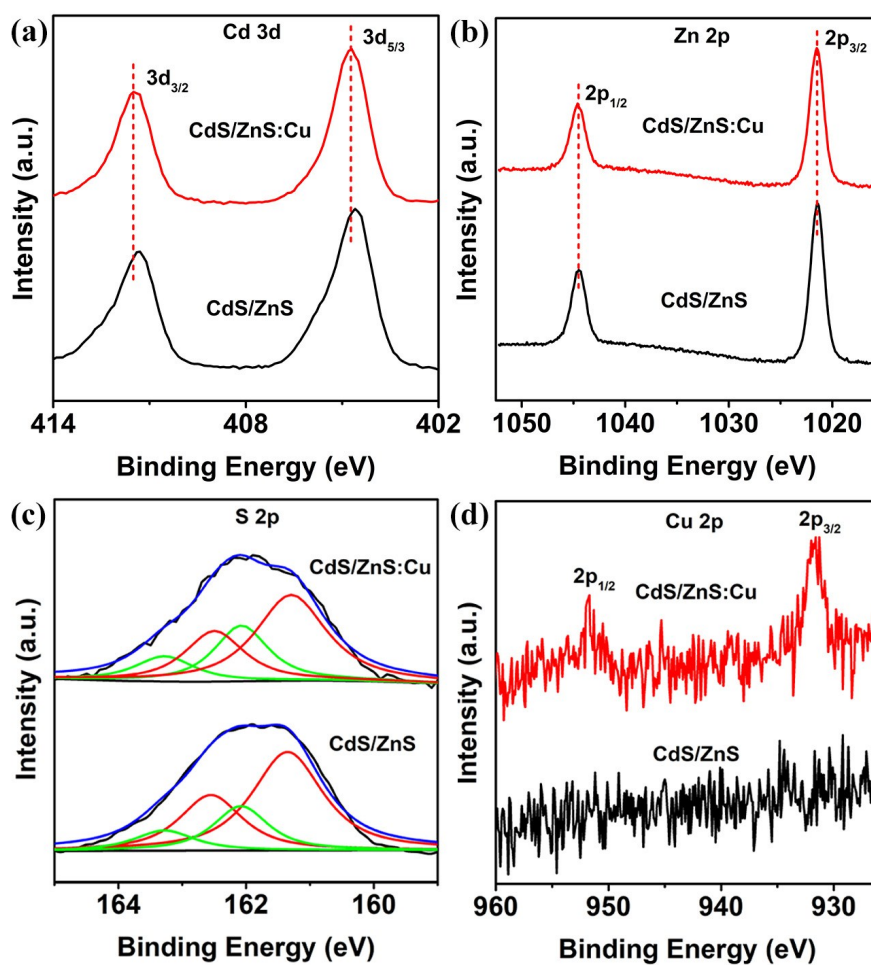

**Figure S3.** XPS spectra of CdS/ZnS core/shell NCs and CdS/ZnS NCs after injecting 1 mL of Cu(DDTC)<sub>2</sub>: (a) Cd 3d; (b) Zn 2p; (c) S 2p; (d) Cu 2p.

**Figure S4**

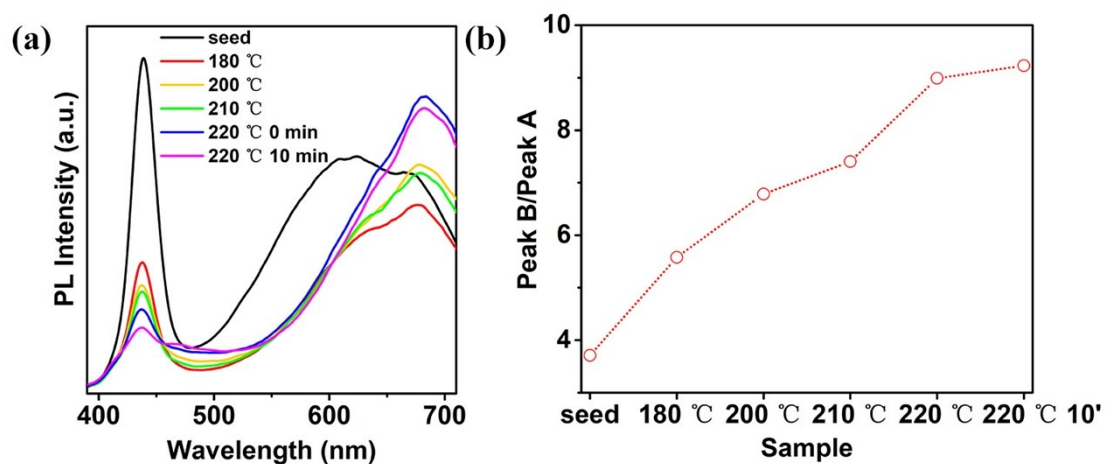

**Figure S4.** (a) PL spectra of the Cu(I) doped CdS/ZnS NCs (0.5 mL of Cu precursor solution) during the heating process; (b) the ratio of the integral area of the peak at longer wavelength to that of the shorter wavelength for different heating temperature.
